# Supplementary material
Source: Springer Nature journal article supplement (https://www.springermedizin.de/resource/supplementary/12885_2009_1999_MOESM4_ESM.pdf/9460278)

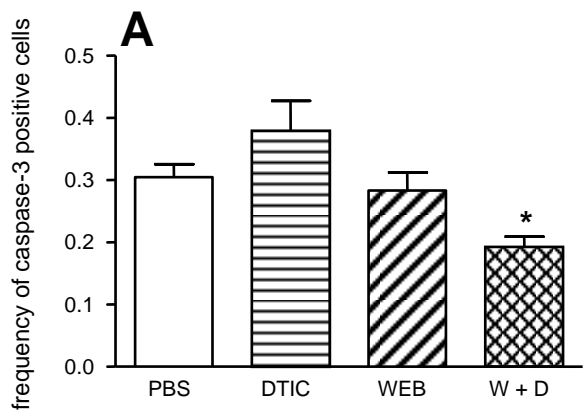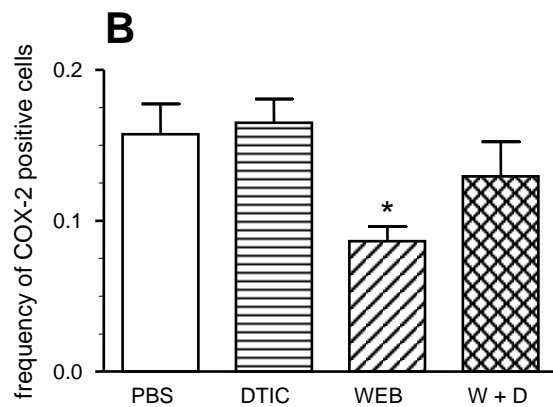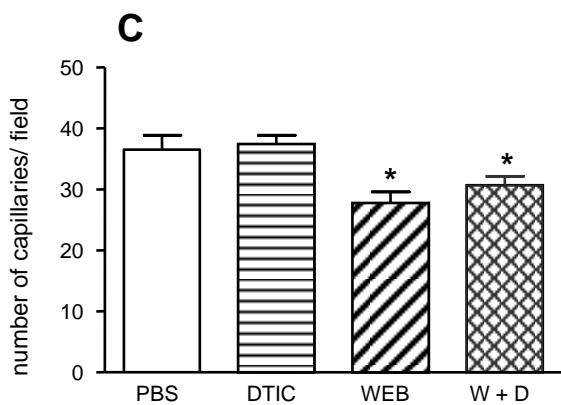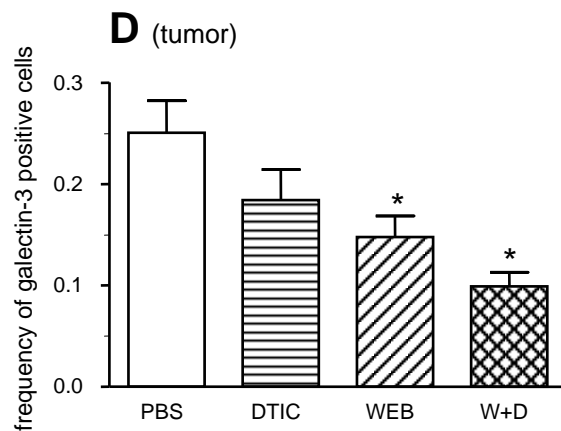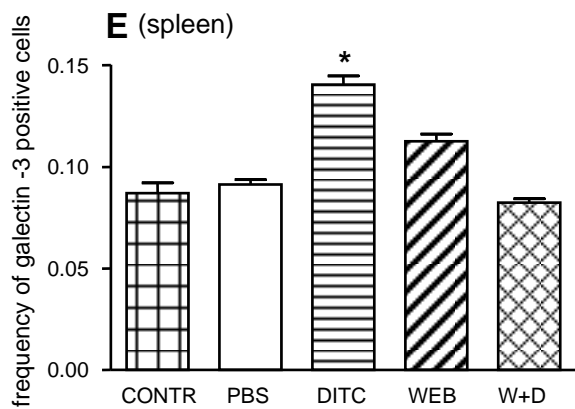

Supplement: MOESM4 [file 9460278]
